# Supplementary material
Source: HighWire-hosted journal article supplement (https://bmjopen.bmj.com/content/12/2/e047622)
Supplement: inline-supplementary-material-1 [file inline-supplementary-material-1.pdf]

## 干细胞治疗急性重症肾损伤的临床研究

### 受试者须知

版本号: v1.0 版本日期: 2019年3月14日

#### 尊敬的患者:

我们邀请您参加“干细胞治疗急性重症肾损伤的临床研究”。您将在完全自愿的情况下参加此项试验。了解关于本试验的信息对您决定是否参加非常重要。我们的研究人员将告知您试验相关情况并回答您的问题。您可以对家人和朋友说明您的打算。请您充分考虑然后做出决定。本研究已经得到解放军总医院医学伦理委员会的审查和批准。

#### 一、研究背景

急性肾损伤 (Acute kidney injury, AKI) 是严重危害健康的重要疾病, 我国每年AKI发病率超过300万。缺血、感染、药物等皆可导致AKI, 它不仅增加液体超负荷所致的全身性影响, 而且与心功能不全、肝功能不全、肺损伤以及小肠上皮细胞凋亡等明显相关。由于AKI病因复杂, 针对AKI某一关键介质或环节的治疗效果并不显著。目前国内外缺乏有效治疗手段, 临床上通常进行支持治疗或者透析治疗, 医疗花费大, 并发症发生风险高, 严重患者病死率可达50%以上。其中一半的重症AKI发展为慢性肾脏病, 最终走向尿毒症。为此, 开拓潜在机制的研究视野, 探索并开发一种新型、有效的治疗AKI方法是亟待解决的重大问题。

解放军总医院内分泌科用干细胞治疗糖尿病已可以达到胰岛素使用减量甚至短期内停用的效果。另外, 脐带间充质干细胞 (MSC) 治疗心脏术后AKI的早期临床研究结果表明, MSC可在AKI患者安全使用, 并具有肾脏保护作用, 缩短住院时间, 减少再入院率。中山大学附属第三医院前期研究发现, 自体来源MSC可以使得亲属供肾肾移植患者获得更低的急性排斥发生率以及术后感染发生率, 减少术后他克莫司的使用剂量, 同时一年内移植肾功能恢复更加良好。南京大学医学院附属鼓楼医院用异体脐带间充质干细胞对系统性红斑狼疮患者静脉输注后肾功明显好转, 肾小球滤过率显著提升, 狼疮活动指数下降, 减少了强的松和免疫抑制药物用药剂量, 相应减少激素用药副作用, 长达12个月的随访过程中无间充质干细胞相关不良反应发生, 证实了间充质干细胞细胞治疗的有效性和安全性。国外的肾移植病人接受间充质干细胞治疗的数个临床试验均证明了其有效性和安全性。韩国、加拿大、日本、印度等国相继批准自体与异体间充质干细胞新药产品上市、进入临床应用。随着间充质干细胞的临床应用日益增多, 其对重症AKI治疗作用也日益成为焦点。但是国内在临床应用MSC治疗重症AKI还缺少前瞻对照临床试验。

#### 二、研究目的

本课题组开展此项前瞻性随机对照研究, 通过外周静脉输注 MSC, 之后定期随访观察, 评估 MSC 对重症 AKI 的治疗效果, 促进 MSC 临床转化应用, 造福广大患者。

#### 三、研究概况

本次试验是由解放军总医院肾科开展的“干细胞治疗急性重症肾损伤的临床研究”，试验为期4年。该技术经后保部卫生局审批同意进行临床试验，实验方案通过解放军总医院伦理委员会审批。项目总负责人为解放军总医院肾科蔡广研教授。

#### 四、试验设计

单中心、随机、单盲、安慰剂对照临床试验。

#### 五、试验程序

1.入选标准：1) 重症AKI；2) 年龄在18~65岁之间；3) 签署知情同意书；4) 愿意接受后续随访。

2.排除标准：1) 肾后性AKI及肾小球肾炎，狼疮肾炎，ANCA相关性肾炎，抗基底膜肾病，冷球蛋白血症，血栓性微血管病，紫癜性肾炎所致AKI；2) 妊娠或哺乳期妇女；3) 过敏体质者；4) 已行器官移植或造血干细胞移植者；5) 恶性肿瘤患者或有肿瘤病史者；6) 预期寿命小于3个月；7) 已知的终末期肝病；8) 不可控感染；9) 65岁以下患者，在AKI发生前测量的估计肾小球滤过率小于60ml/min/1.73m<sup>2</sup>，65岁以上患者，在AKI发生前测量的估计肾小球滤过率小于45ml/min/1.73m<sup>2</sup>；10) 严重的肺功能障碍（COPDIII、IV级、肺动脉高压）；11) 严重的心脏功能障碍（NYHA心功能III、IV级）或左室射血分数小于40%，严重的心律失常患者；12) 血流动力学不稳定患者；13) 两个以上非器官功能衰竭；14) 任何病因的急性或慢性血管炎；15) 任何病因的慢性全身性感染史；16) 研究者认为，受试者可能需要逐步增加剂量的血管加压剂以达到和/或维持血液动力学稳定性；17) 全身免疫抑制治疗尚未稳定超过4个月，或在慢性皮质类固醇治疗的情况下，在过去30天内剂量>15mg/天泼尼松；18) 血小板计数<25,000/uL或其他严重的血液学异常，使受试者即将面临死亡危险；19) 需进行机械通气患者；20) 参加其他临床试验者。

3.治疗方案：1) 急性重症肾损伤常规治疗；2) 试验试剂输注：1x10<sup>6</sup>/kg或对照悬液（第0,7天各输注一次，共2次，严格无菌条件下静脉输注）

4.随访观察：1) 患者肾功的改变；2) 患者生存率的改变；3) RRT依赖发生率的改变；4) 完全治愈率和部分治愈率的改变；5) ICU住院天数和住院总天数改变；6) 肾脏损伤指标改变；7) 肾脏修复指标改变。

#### 六、其他的治疗选择

您可以选择：不参加本研究，继续您的常规治疗；参加别的研究；不接受任何治疗。请与您的医生协商您的决定。

#### 七、提前推出试验

您可以不需要任何理由随时要求退出试验，您将不会受到任何歧视。

如果遇到下列情况，研究者或申办者可以终止您的试验而不需征得您的同意。这些情况包括：基于您的最佳医疗利益、您不服从研究人员的安排，您要求使用本实验不允许的药物或治疗或其他原因。如果研究者认为您不适合继续参加本试验，或本试验被申办方/监督管

理部门/伦理委员会终止，您将会退出本试验。如果您提前退出本试验，希望您能完成最后一次回访中描述的检查程序，以保证您的安全。

#### 八、参加本试验的风险和不良反应

1. 采取间充质干细胞输注，较少发生免疫排斥反应，但细胞经过体外扩增，个别病例会出现皮肤过敏反应：如皮疹、荨麻疹、面部水肿等。

2. 偶发发热、头痛、疲劳等反应。

3. 在输注的静脉周围可能会出现疼痛、肿胀或瘀血，也有发生感染的风险。

4. 目前国内外没有实施间充质干细胞治疗急性肾损伤而产生严重副作用的报道资料。新技术试验或许存在目前还不为所知的风险。

#### 九、试验风险、不良反应的应对措施及补偿

1. 在您参加该试验前我们将会对您进行严格的病史询问、体格检查及辅助检查，如经临床判断您参加试验可能会出现风险，我们将不建议您参加本试验。

2. 当您已经参与本试验，在试验期间您出现任何医学不适，您将被严密监护，研究者将评估该不适是否与试验试剂相关，如临床判断您不再适合继续该试验，我们将建议您退出试验。

3. 您会被及时告知干细胞治疗重症急性肾损伤的最新信息。在试验期间，如果研究者认为您面临发生副作用的高度风险时，可能不会允许您继续该试验。

4. 如果您的健康确因参加这项研究而发生与研究相关的损害，请立即通知研究医生进行专业判断，并对您采取适当的治理措施，解放军总医院将承担适当治疗费用及经济补偿。对因医疗事故或因未遵循研究方案而导致的损伤，申办者不予补偿。

#### 十、试验相关利益

1. 如果您符合条件，将会被随机分配至试验组或对照组。分配至试验组的患者将免费接受间充质干细胞治疗，由于接受了干细胞输注治疗，远期预后可能得到一定程度改善，分配至对照组的患者在整个疗程中仍然可以享受临床专家密切的随访观察及指导，获得最便捷的治疗，了解您的疾病预后。您不会因参加本研究而获得任何酬劳。为了补偿您参加本研究可能给您带来的不便，本研究将减免部分您参加本项研究期间所做的研究相关检查费用。

#### 十一、保密

我们对这一试验采取严格的私密性和保密性保护措施，您的个人信息暴露的风险是很小的。

#### 十二、自愿参加

参加本研究是完全自愿的，您可以拒绝参加研究，或者研究过程中的任何时候选择退出研究，不需任何理由。该决定不会影响您未来的治疗。

## 干细胞治疗急性重症急性肾损伤临床研究-知情同意书

本试验相关的信息研究者已经向我解释清楚，我已经阅读并理解这份知情同意书，我提出的所有问题都已经得到满意的答复，了解本试验的风险和我的权益，我自愿同意参加这个试验，我同意除本研究以外的其他研究经过伦理委员会批准后可以利用我的医疗记录，我签署这份知情同意书并不意味放弃我的法定权利。且我得到一份具有签名及日期的知情同意书。

受试者签名：\_\_\_\_\_ 日期：\_\_\_\_\_

姓名正楷：\_\_\_\_\_

受试者联系电话：\_\_\_\_\_

法定代理人签名（若适用）：\_\_\_\_\_ 日期：\_\_\_\_\_

法定代理人姓名正楷：\_\_\_\_\_

研究者声明：我确认已向患者解释了本研究的详细情况，特别是参加本研究可能产生的风险和收益。

研究者签名：\_\_\_\_\_ 日期：\_\_\_\_\_

研究者姓名正楷：\_\_\_\_\_

研究者联系电话：\_\_\_\_\_
